# Supplementary material for: Enhancing Virion Tethering by BST2 Sensitizes Productively and Latently HIV-infected T cells to ADCC Mediated by Broadly Neutralizing Antibodies
Source: PubMed Central journal article supplement (PMC5112552; doi:10.1038/srep37225), 2016-11-17

**Enhancing Virion Tethering of HIV by BST2 Sensitizes Productively and Latently  
Infected T cells to ADCC Mediated by Broadly Neutralizing Antibodies**

Tram N.Q. Pham<sup>1</sup>, Sabelo Lukhele<sup>1</sup>, Frédéric Dallaire<sup>1</sup>, Gabrielle Perron<sup>1</sup>

Éric A. Cohen<sup>1,2\*</sup>

**SUPPLEMENTARY INFORMATION**

## Supplementary Figure Legends

**Fig. S1. Neutralization potency and ADCC potential of anti-HIV antibodies.** CEM CD4<sup>+</sup> T cells were infected with prototypic virus CCR5-tropic NL4.3.ADA.IRES.GFP WT strain and at 2 dpi infected cells were examined for (a) cell-surface Env expression and (b) susceptibility to ADCC using different concentrations of NAbs (in µg/ml). (c) Neutralizing antibodies were evaluated for their ability to neutralize cell-free virus. Extent of Env staining on GFP<sup>+</sup> T cells over a range of concentrations was expressed as averaged median fluorescence intensity (MFI) units from 3 to 4 experiments. PBMCs from healthy donors were used as effector cells. Percentages of Ab-specific ADCC were determined following subtraction of cell lysis mediated by control IgG from that by test antibody. Mean ADCC activity from at least 4-7 donors is indicated. Serial dilutions of known concentrations of NAbs (or as control, PBS) were pre-incubated with prototypic CCR5-tropic NL4.3.ADA.IRES.GFP WT virus for 45 min at 37 °C. Luciferase-expressing HeLa TZMbl reporter cells were subsequently added to Ab-virus complexes. Forty-eight hours later, infected cells were lysed and relative light units enumerated on a luminometer. Data were analyzed using GraphPad Prism. Shown are mean IC<sub>50</sub> from 2 to 3 experiments; ND, not done.

**Fig. S2. Cell-surface envelope, CD4 and BST2 expression profiles on HIV-infected CEM CD4<sup>+</sup> T cells.** Parental CEM CD4<sup>+</sup> T cells were infected or mock-infected with CCR5-tropic NL4.3.ADA.IRES.GFP WT virus or derivatives lacking Vpu (U-), Nef (N-) or both (N-U-). The N-U-D368A virus has a mutation within the CD4-binding site of Env

causing defective CD4-Env interactions. At 2 dpi, infected cells were analyzed by flow cytometry for (a) Env using indicated NAbs and (b) CD4 using anti-CD4 Ab. (c) Alternatively, CEM CD4<sup>+</sup> T cells expressing (NT) or depleted (SH) of BST2 were infected with the indicated viruses as in Panel a and analyzed for cell-surface BST2 using anti-BST2 Ab or pre-immune serum (PI) as control. Shown in Panels a and c are expression levels on GFP<sup>+</sup> cells presented as MFI units from a representative experiment. Panel b indicates mean CD4 expression from 3 experiments.

**Fig. S3: Cell-surface envelope and BST2 expression profiles on HIV-infected**

**primary CD4<sup>+</sup> T cells.** Activated CD4<sup>+</sup> T cells were infected or mock-infected with

CCR5-tropic NL4.3.ADA.IRES.GFP WT virus or derivatives lacking Vpu (U-), Nef (N-) or both (N-U-). The N-U-D368A virus has a mutation within the CD4-binding site of Env causing defective CD4-Env interactions. At 3 dpi, infected GFP<sup>+</sup> cells were analyzed by flow cytometry for (a) Env using indicated NAbs or (b) BST2 using anti-BST2 Ab.

Shown in both Panels a and b are mean expression levels on GFP<sup>+</sup> cells presented as MFI units from 3 different donors.

**Fig. S4: Reactivated latent T cell lines are targets of ADCC and Vpu dampens**

**PGT121-mediated ADCC response.** Jurkat-based T cells latently infected with CCR5-

tropic NL4.3.ADA.IRES.GFP WT or its mutant derivatives lacking Vpu (U-), Nef (N-) or both (N-U-) viruses were treated with TNF $\alpha$  and examined for their susceptibility to

ADCC mediated by PGT121. PBMCs from healthy donors were used as effector cells.

(a) Examples of ADCC response from 2 donors. (b) Compilation of PGT121-specific ADCC. Boxes and whiskers graph shows median ADCC from 4 donors.

**a**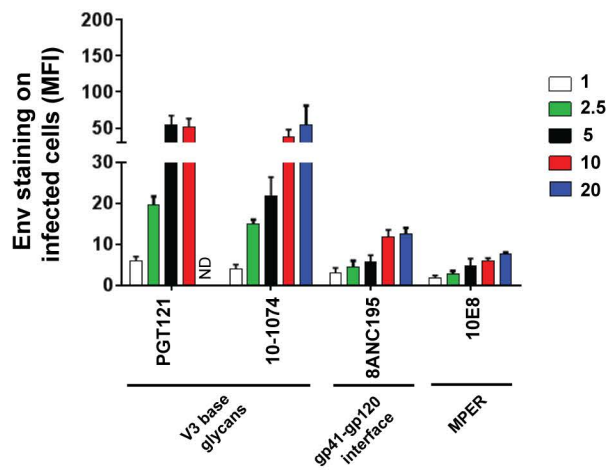**b**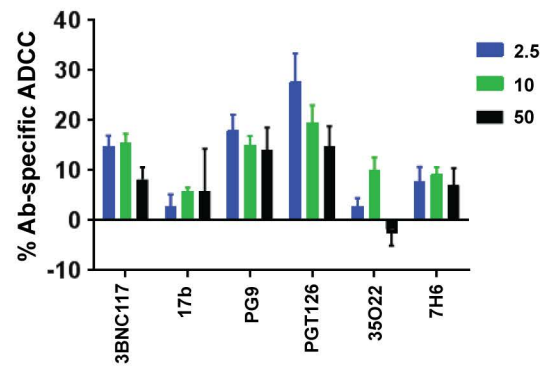**c**

| Antibody | Epitope (Env region)    | IC <sub>50</sub> ± S.D. (µg/ml) |
|----------|-------------------------|---------------------------------|
| 3BNC117  | CD4-bs (gp120)          | 0.07 ± 0.03                     |
| 17b      | CoR-bs (gp120)          | 1.30 ± 2.08                     |
| PG9      | V1/V2 apex (gp120)      | 0.07 ± 0.02                     |
| PGT121   | V3 base glycans (gp120) | 0.04 ± 0.02                     |
| PGT126   | V3 base glycans (gp120) | 0.04 ± 0.01                     |
| 35O22    | gp41-gp120 interface    | 17.78 ± 9.50                    |
| 7H6      | MPER (gp41)             | 0.26 ± 0.10                     |

**a**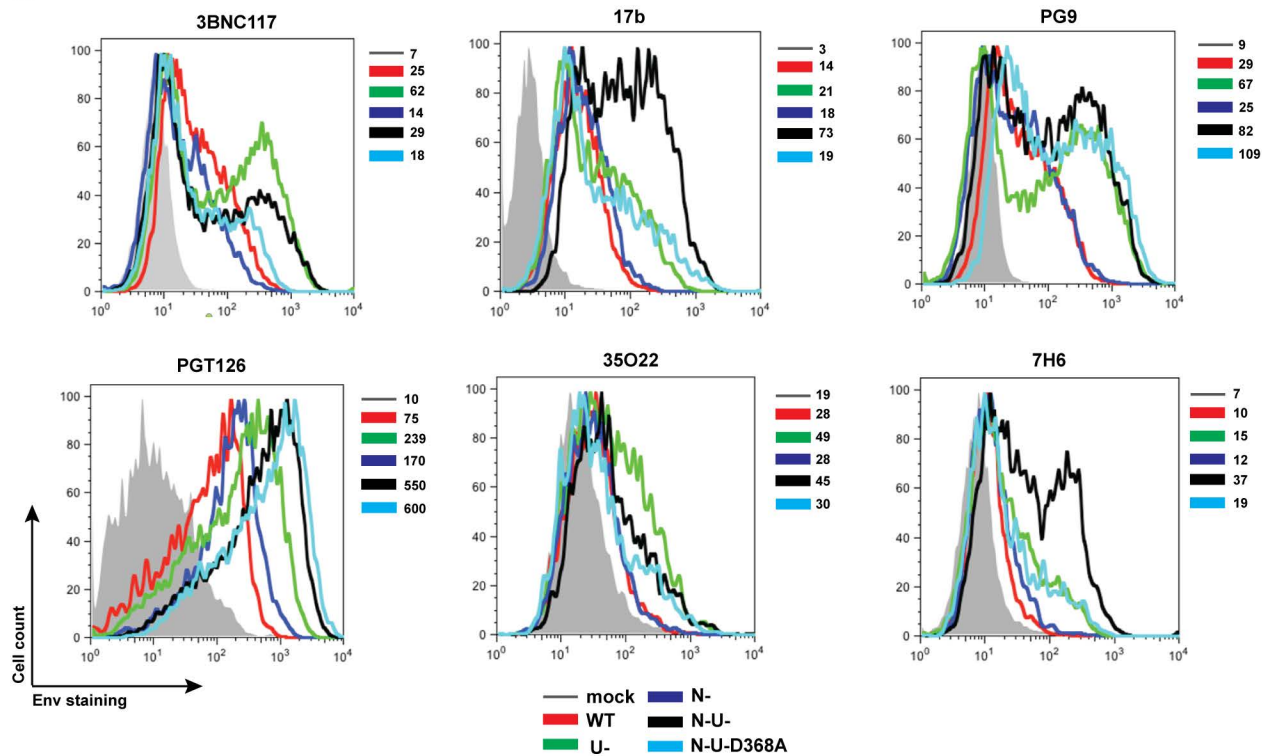**b**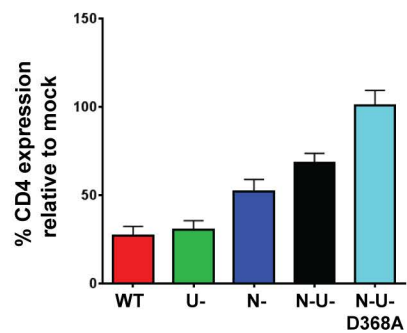**c**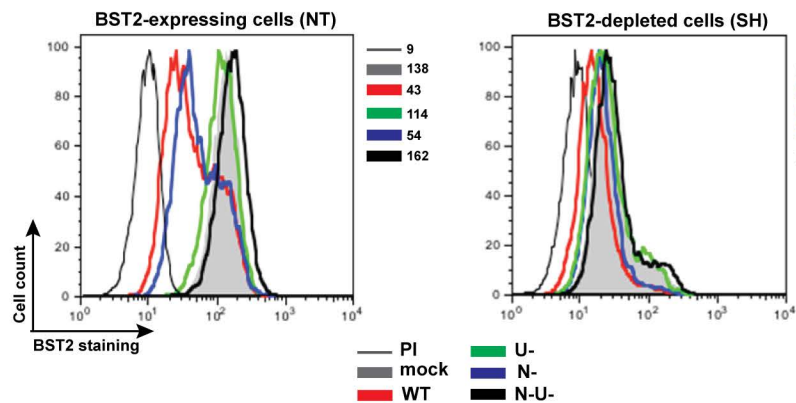**Fig. S2**

**a**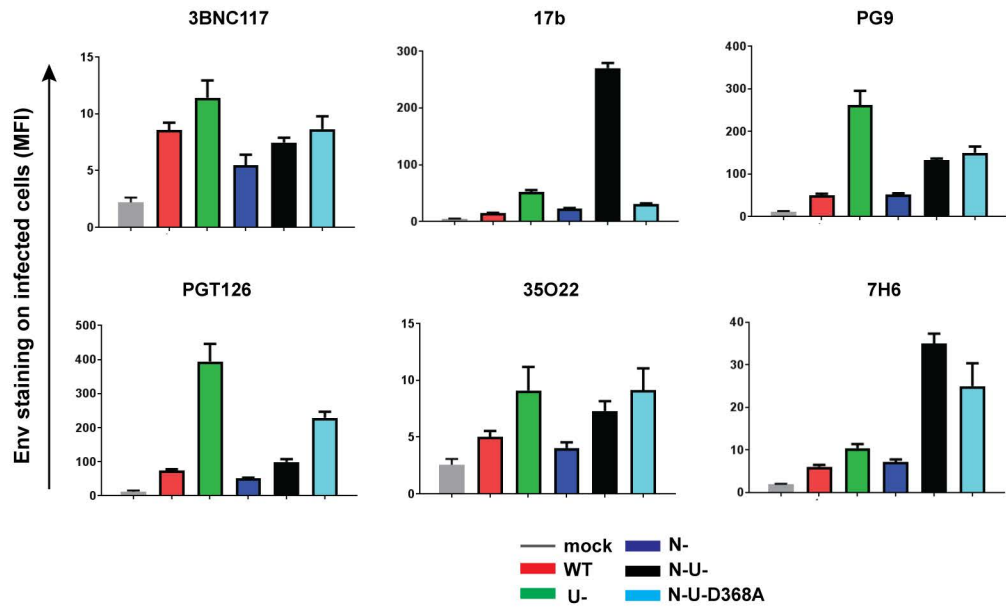**b**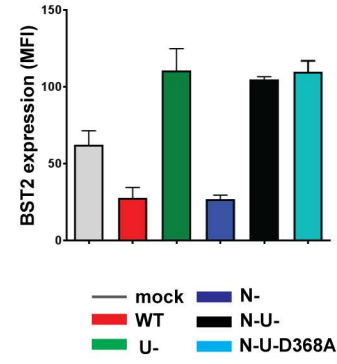**Fig. S3**

**a**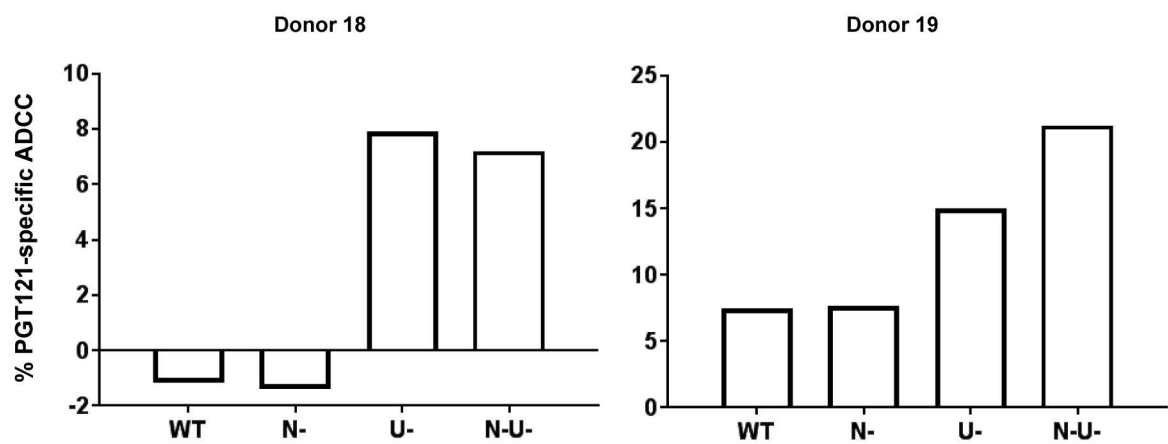**b**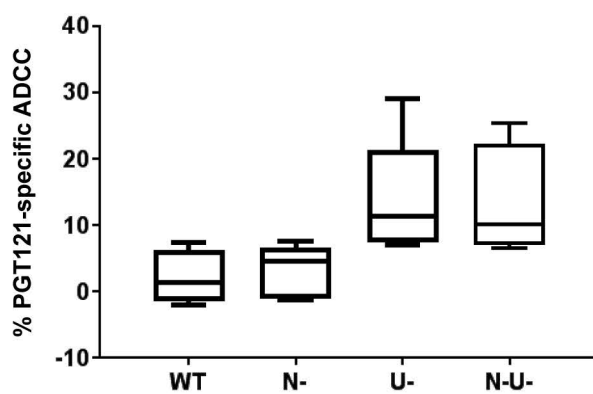

Supplement: srep37225-s1.pdf [file srep37225-s1.pdf]
